# Supplementary material for: Water-enhanced CO2 capture with molecular salt sodium guanidinate
Source: Royal Society of Chemistry journal article supplement (doi:10.1039/d4ta03037k), 2024-01-01
Supplement: d4ta03037k1.pdf [file d4ta03037k1.pdf]

Electronic Supplementary Information (ESI):  
**Water-Enhanced CO<sub>2</sub> Capture with Molecular Salt Sodium  
Guanidinate**

*Hayden A. Evans,<sup>1\*</sup> Marcus Carter,<sup>1</sup> Wei Zhou,<sup>1</sup> Taner Yildirim,<sup>1</sup> Craig M. Brown,<sup>1,2</sup> Hui Wu<sup>1\*</sup>*

<sup>1</sup>NIST Center for Neutron Research, National Institute of Standards and Technology,  
Gaithersburg, Maryland 20899-6102 United States;

<sup>2</sup>Department of Chemical and Biomolecular Engineering, University of Delaware, Newark,  
Delaware 19716, United States.

Email: [hayden.evans@nist.gov](mailto:hayden.evans@nist.gov); [huiwu@nist.gov](mailto:huiwu@nist.gov)

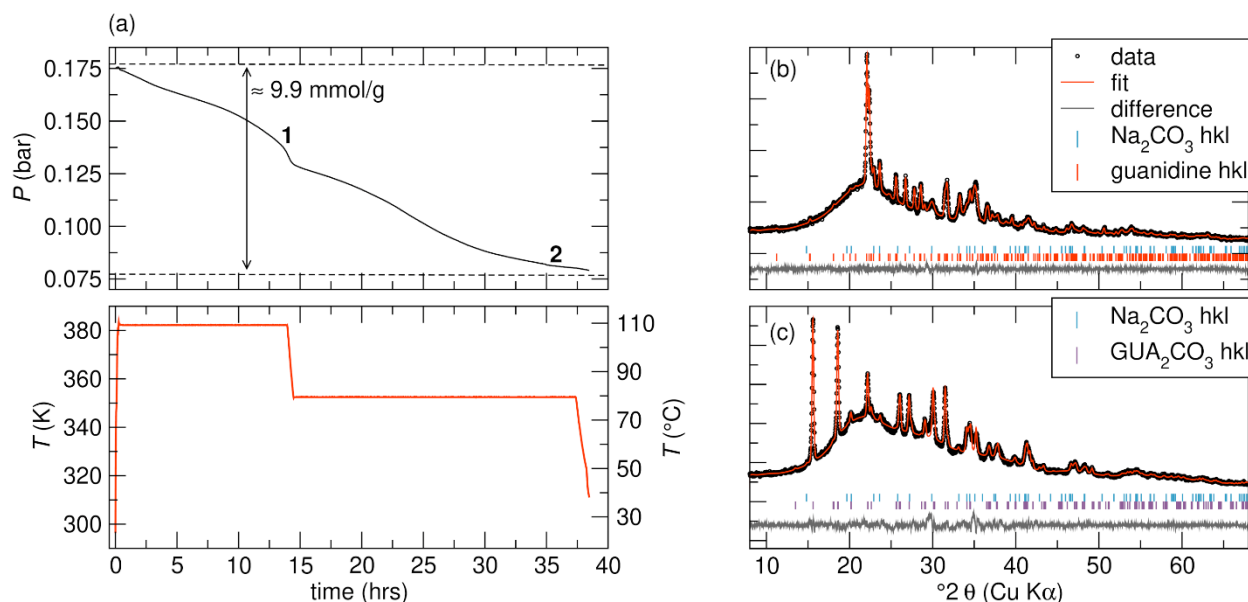

**Fig. S1.** (a) (top) CO<sub>2</sub> absorption change profile with an initial  $\approx 0.1$  bar CO<sub>2</sub> pressure and the (bottom) tested temperature range of NaCN<sub>3</sub>H<sub>4</sub>. Temperature was intentionally reduced after induction to minimize the unwanted side reactions from the unstable intermediates under low CO<sub>2</sub> pressure and static humidity-limit condition (see more explanation in Fig. S16); b) and c) PXR D Pawley fitting results of the products collected at the end of induction (b) (Monoclinic Na<sub>2</sub>CO<sub>3</sub>, Space group 12,  $a = 8.915(7)$  Å  $b = 5.249(6)$  Å  $c = 6.064(3)$  Å,  $\beta = 99.87(9)^{\circ}$ . Orthorhombic guanidine, space group 61,  $a = 8.561(2)$  Å  $b = 9.210(2)$  Å  $c = 15.746(5)$  Å) and after the complete reaction. (c) (labeled as stage “1” and “2” in top panel (a), respectively) (Tetragonal guanidinium carbonate (labeled as GUA<sub>2</sub>CO<sub>3</sub> in Fig.), space group 92,  $a = b = 6.960(1)$ ,  $c = 19.567(4)$ . Monoclinic Na<sub>2</sub>CO<sub>3</sub>, Space group 12,  $a = 8.900(2)$  Å,  $b = 5.214(2)$  Å,  $c = 6.045(2)$  Å,  $\beta = 100.70(3)^{\circ}$ .) The products after final absorption with an initial 0.1 bar CO<sub>2</sub> pressure appear the same as those observed after final absorption with an initial 1 bar CO<sub>2</sub> pressure.

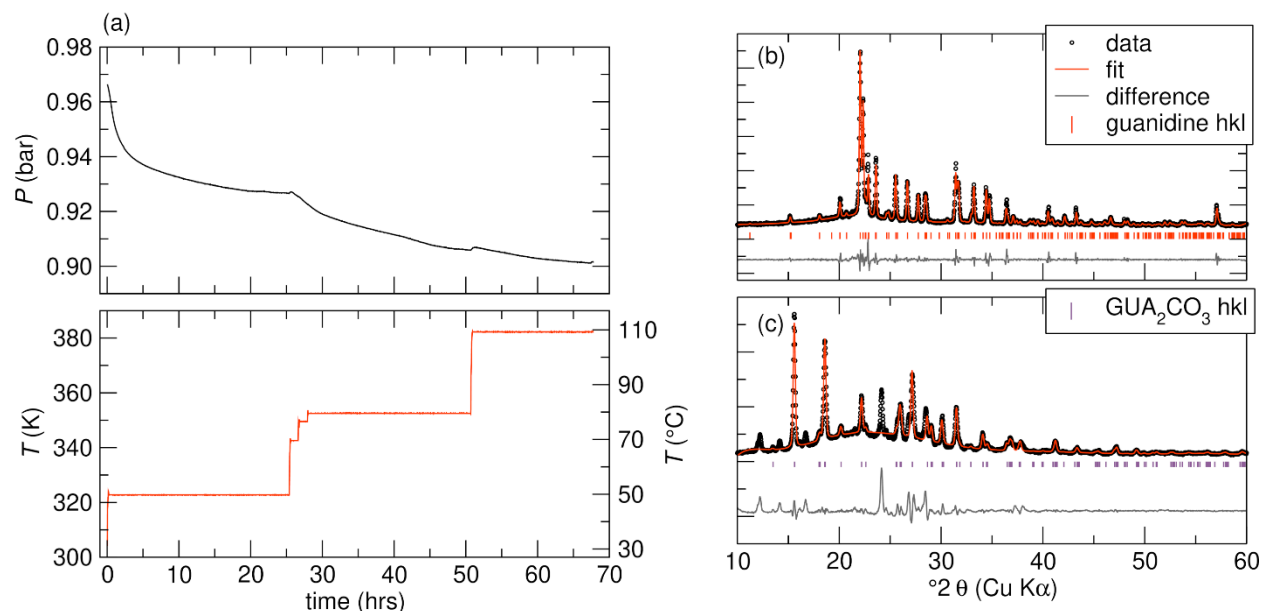

**Fig. S2.** a) (top) CO<sub>2</sub> absorption change profile with an initial  $\approx 1.0$  bar CO<sub>2</sub> pressure and the (bottom) tested temperature range of guanidine (CN<sub>3</sub>H<sub>5</sub>); b) The Pawley fit XRD pattern of the initial pristine guanidine CN<sub>3</sub>H<sub>5</sub> (Orthorhombic guanidine, space group 61,  $a = 8.581(1)$  Å  $b = 9.219(1)$  Å  $c = 15.776(2)$  Å) and (c) Pawley fit of the final product after chemisorption with CO<sub>2</sub> shown in a) (Tetragonal guanidinium carbonate (labeled as GUA<sub>2</sub>CO<sub>3</sub> in Fig.), space group 92,  $a = b = 6.960(1)$ ,  $c = 19.567(4)$ ). The XRD pattern of the chemisorption product shows extra peaks from unknown phases besides (CN<sub>3</sub>H<sub>6</sub>)<sub>2</sub>CO<sub>3</sub>, indicating possible side reactions occurring during absorption. Compared to NaCN<sub>3</sub>H<sub>4</sub>, the bulk guanidine shows rather sluggish reaction with CO<sub>2</sub> with the formation of unknown impurity phase(s) from possible side reactions accompanied. Therefore, we expect that the guanidine formed during the induction of NaCN<sub>3</sub>H<sub>4</sub> should be in the form of many small crystallites or droplets embedded evenly throughout the sample because of the progressive spreading of H<sub>2</sub>O. Such small size guanidine crystallites/droplets would presumably help improve kinetics upon reacting with CO<sub>2</sub> in terms of the reduced diffusion distances and increased accessibility of CO<sub>2</sub> reaction sites. This might also contribute to the rapid absorption after the induction.

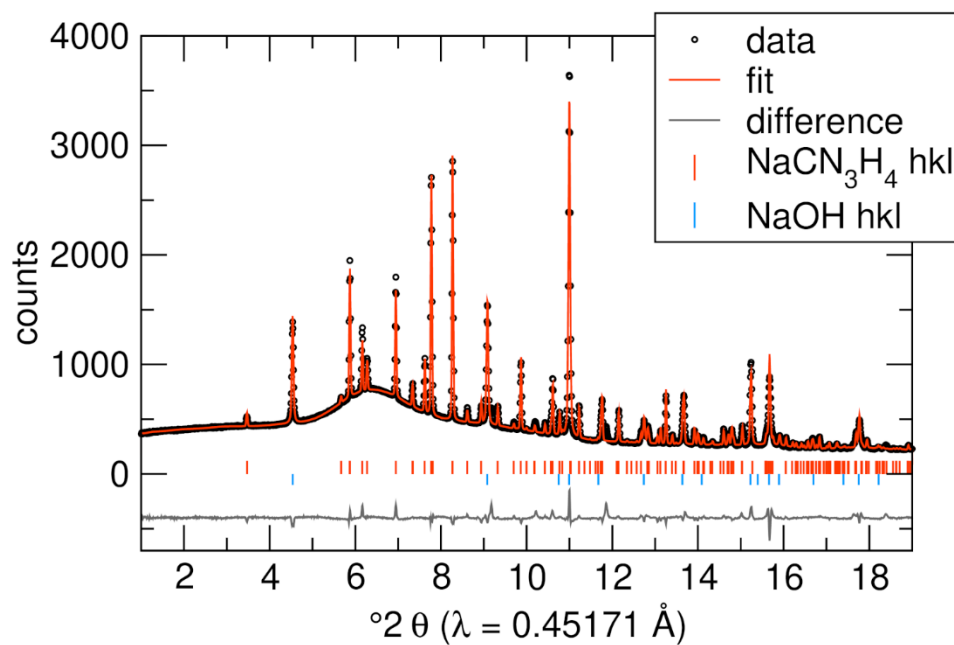

**Fig S3.** Representative Rietveld refinement fit of X-ray powder diffraction data of NaCN<sub>3</sub>H<sub>4</sub> under static limited humidity CO<sub>2</sub> after 0.10 hours, 330 K [APS, 17-BM].  $R_{wp} = 3.53\%$ . Monoclinic NaCN<sub>3</sub>H<sub>4</sub>, Space group 14,  $a = 7.9671(2) \text{ \AA}$   $b = 5.0825(2) \text{ \AA}$   $c = 9.4202(3) \text{ \AA}$   $\beta = 110.687(3)^\circ$ . Orthorhombic NaOH, space group 63,  $a = 3.4061(1) \text{ \AA}$   $b = 3.4061(1) \text{ \AA}$   $c = 11.4035(3) \text{ \AA}$ .

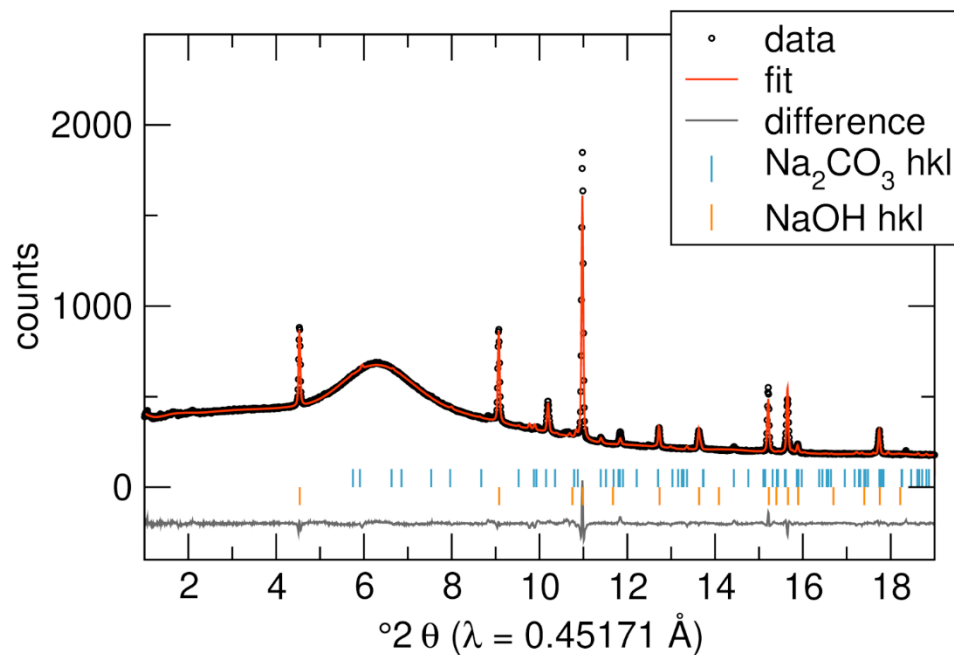

**Fig S4.** Representative Rietveld refinement fit of X-ray powder diffraction data of  $\text{NaCN}_3\text{H}_4$  under static limited humidity  $\text{CO}_2$  after 7 hours, 383 K [APS, 17-BM].  $R_{\text{wp}} = 2.36\%$ . Monoclinic  $\text{Na}_2\text{CO}_3$ , Space group 12,  $a = 8.846(1) \text{ \AA}$   $b = 5.303(1) \text{ \AA}$   $c = 6.099(1) \text{ \AA}$   $\beta = 100.87(2)^\circ$ . Orthorhombic  $\text{NaOH}$ , space group 63,  $a = 3.4124(1) \text{ \AA}$   $b = 3.4124(1) \text{ \AA}$   $c = 11.4201(4) \text{ \AA}$ .

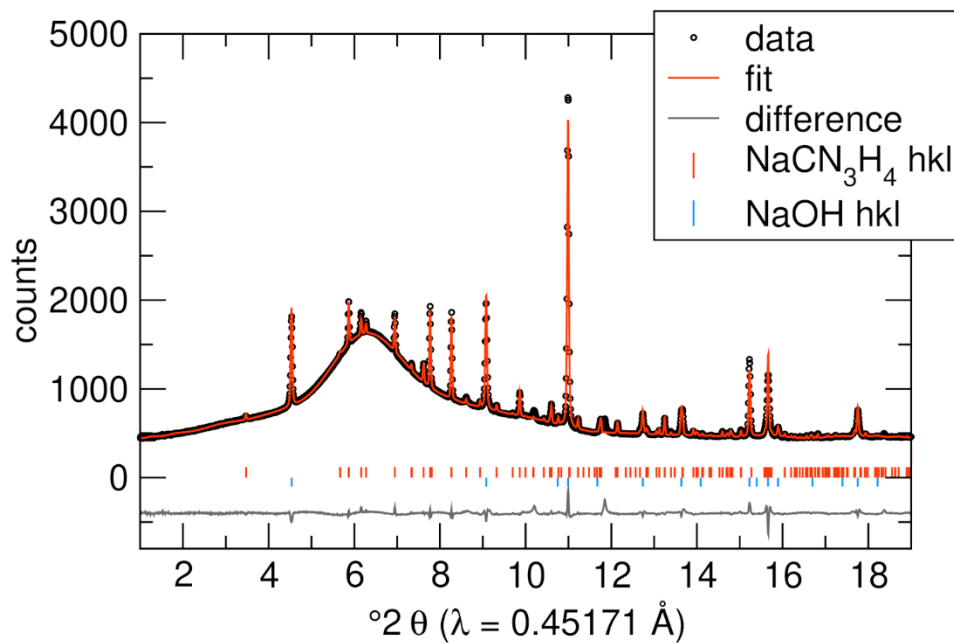

**Fig S5.** Representative Rietveld refinement fit of X-ray powder diffraction data of NaCN<sub>3</sub>H<sub>4</sub> under flow limited humidity CO<sub>2</sub> flow after 10 minutes, 350 K [APS, 17-BM].  $R_{wp} = 2.32\%$ . Monoclinic NaCN<sub>3</sub>H<sub>4</sub>, Space group 14,  $a = 7.9681(5)$  Å  $b = 5.0872(3)$  Å  $c = 9.4244(6)$  Å  $\beta = 110.669(6)^\circ$ . Orthorhombic NaOH, space group 63,  $a = 3.4083(1)$  Å  $b = 3.4083(1)$  Å  $c = 11.4117(4)$  Å.

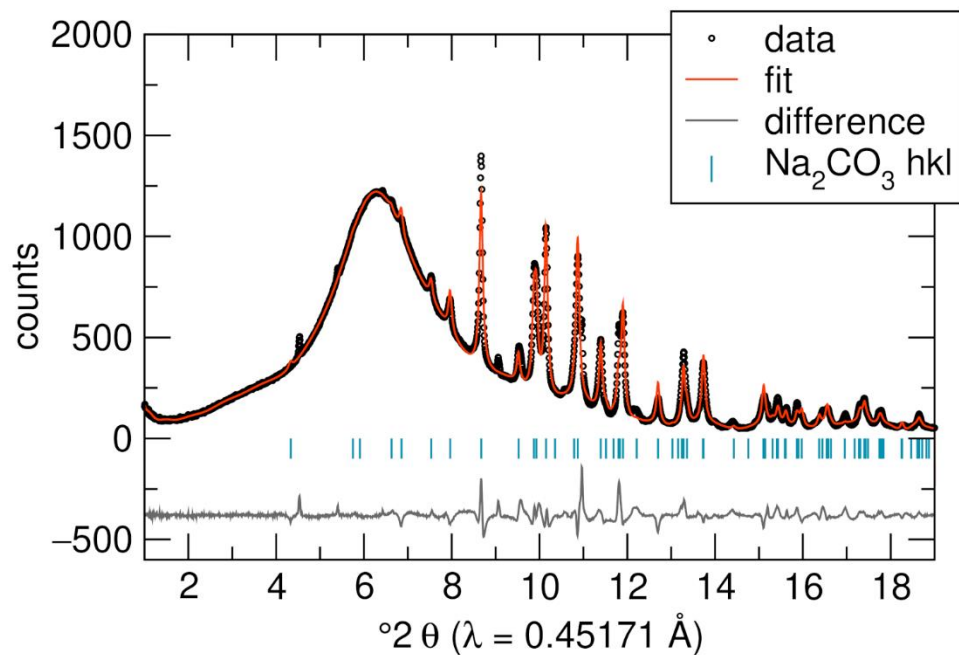

**Fig S6.** Rietveld refinement fit of X-ray powder diffraction data of  $\text{NaCN}_3\text{H}_4$  under flow limited humidity  $\text{CO}_2$  flow after 180 minutes, 383 K [APS, 17-BM].  $R_{\text{wp}} = 2.98 \%$ . Monoclinic  $\text{Na}_2\text{CO}_3$ , Space group 12,  $a = 8.922(1) \text{ \AA}$   $b = 5.2435(7) \text{ \AA}$   $c = 6.0788(9) \text{ \AA}$   $\beta = 100.978(7)^\circ$ .

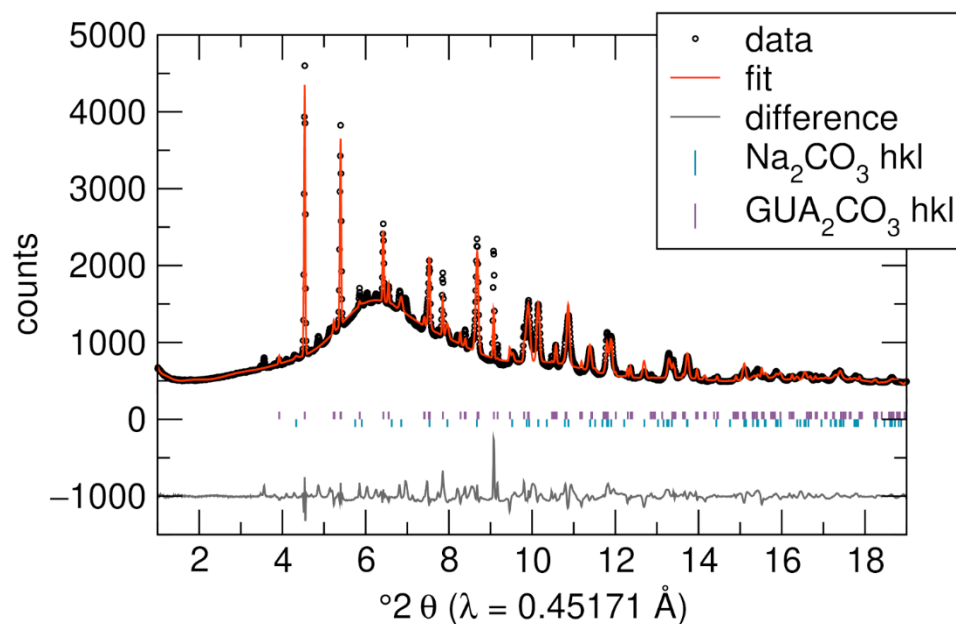

**Fig S7.** Rietveld refinement fit of X-ray powder diffraction data of  $\text{NaCN}_3\text{H}_4$  under flow limited humidity  $\text{CO}_2$  flow after 420 minutes, 383 K [APS, 17-BM].  $R_{\text{wp}} = 5.68\%$ . Monoclinic  $\text{Na}_2\text{CO}_3$ , Space group 12,  $a = 8.929(1) \text{ \AA}$   $b = 5.253(1) \text{ \AA}$   $c = 6.084(1) \text{ \AA}$   $\beta = 100.91(1)^\circ$ . Orthorhombic guanidinium carbonate (labeled  $\text{GUA}_2\text{CO}_3$  in Fig.), space group 92,  $a = 7.001(1) \text{ \AA}$   $b = 6.996(2) \text{ \AA}$   $c = 19.728(3) \text{ \AA}$ .



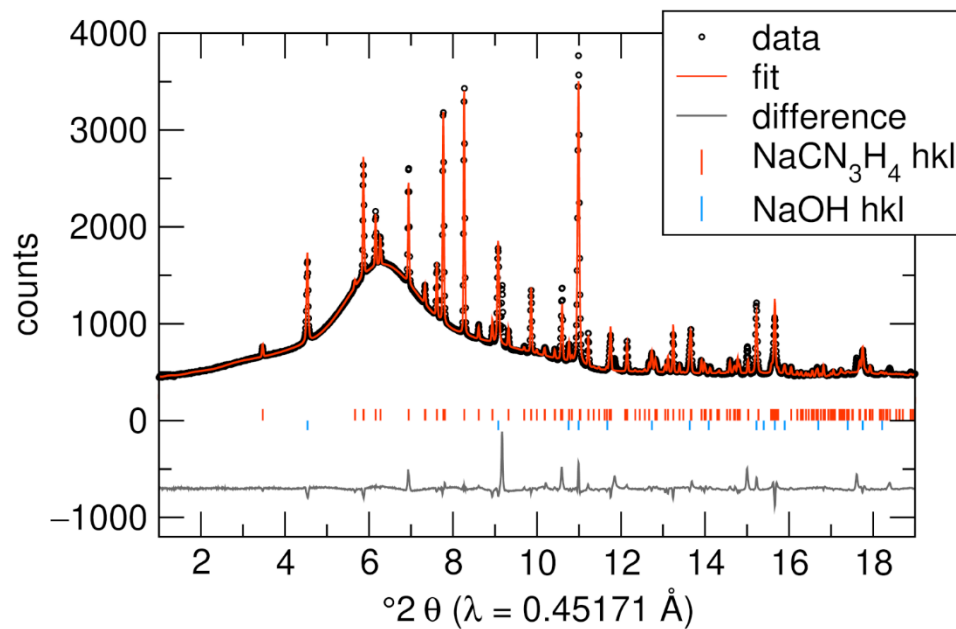

**Fig S8.** Representative Rietveld refinement fit of X-ray powder diffraction data of NaCN<sub>3</sub>H<sub>4</sub> under excess humidity CO<sub>2</sub> flow after 10 minutes, 350 K [APS, 17-BM].  $R_{wp} = 3.82\%$ . Monoclinic NaCN<sub>3</sub>H<sub>4</sub>, Space group 14,  $a = 7.9702(3) \text{ \AA}$   $b = 5.0888(3) \text{ \AA}$   $c = 9.4288(5) \text{ \AA}$   $\beta = 110.680(4)^\circ$ . Orthorhombic NaOH, space group 63,  $a = 3.41(1) \text{ \AA}$   $b = 3.41(1) \text{ \AA}$   $c = 11.4145(5) \text{ \AA}$ .

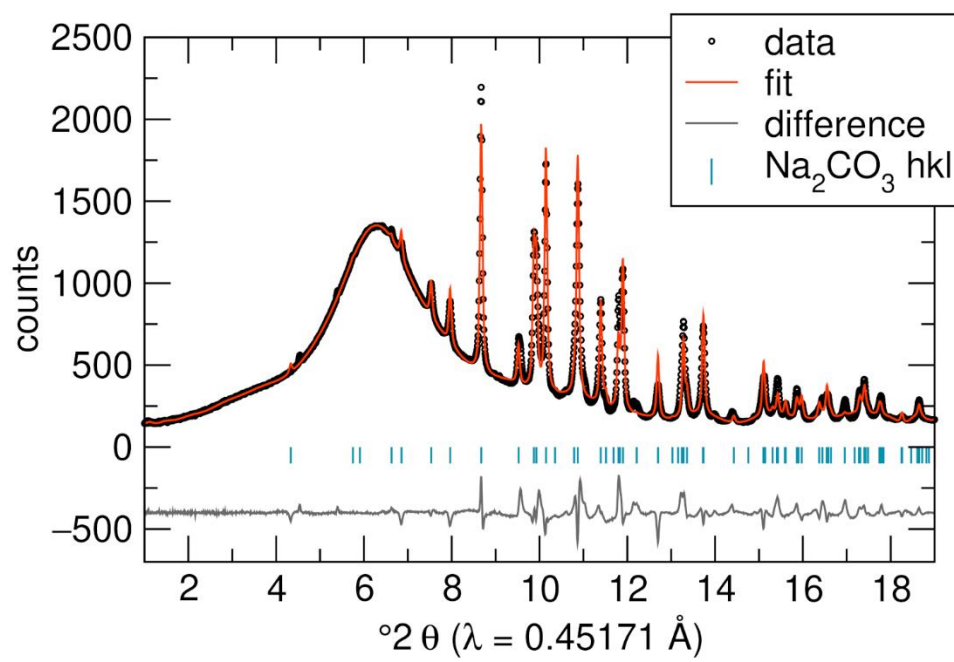

**Fig S9.** Representative Rietveld refinement fit of X-ray powder diffraction data of  $\text{NaCN}_3\text{H}_4$  under excess humidity  $\text{CO}_2$  flow after 50 minutes, 383 K [APS, 17-BM].  $R_{\text{wp}} = 3.93\%$ . Monoclinic  $\text{Na}_2\text{CO}_3$ , Space group 12,  $a = 8.9274(7) \text{ \AA}$   $b = 5.2467(1) \text{ \AA}$   $c = 6.0811(6) \text{ \AA}$ ,  $\beta = 100.979(5)^\circ$ .

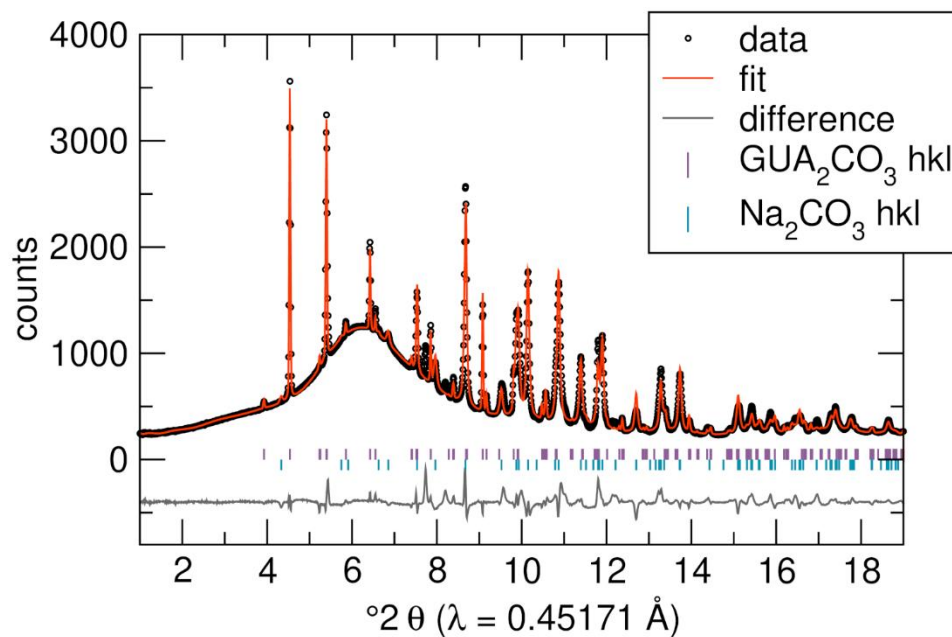

**Fig S10.** Representative Rietveld refinement fit of X-ray powder diffraction data of  $\text{NaCN}_3\text{H}_4$  under excess humidity  $\text{CO}_2$  flow after 200 minutes, 383 K [APS, 17-BM].  $R_{\text{wp}} = 4.49\%$ . Monoclinic  $\text{Na}_2\text{CO}_3$ , Space group 12,  $a = 8.930(1)$  Å,  $b = 5.2481(4)$  Å,  $c = 6.0842(4)$  Å,  $\beta = 100.977(6)^\circ$ . Tetragonal guanidinium carbonate (labeled as  $\text{GUA}_2\text{CO}_3$  in Fig.), space group 92,  $a = b = 6.996(1)$ ,  $c = 19.5712(2)$ .

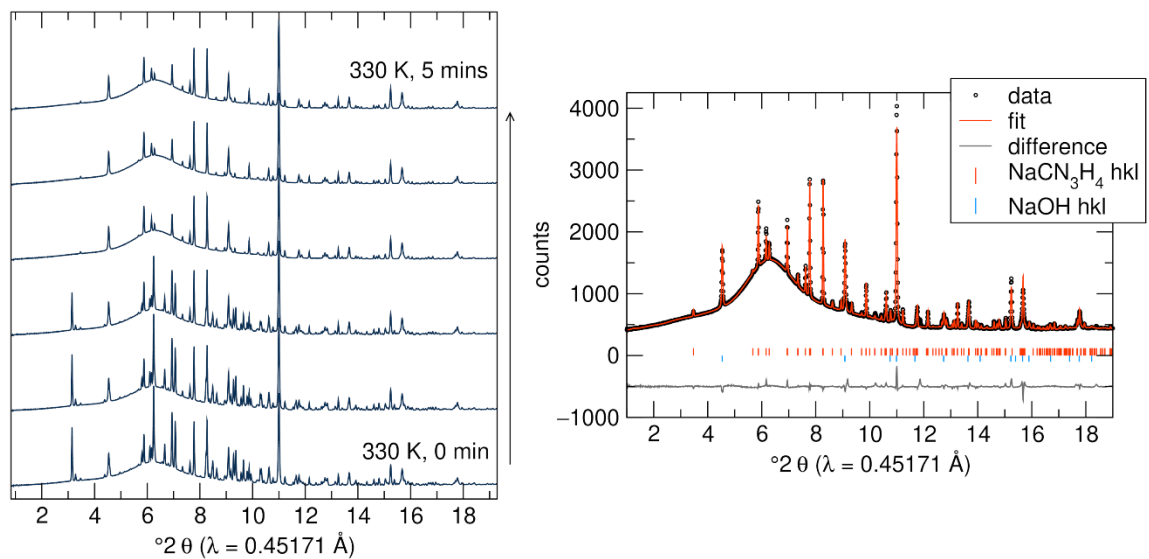

**Fig. S11.** (left) Unexposed as-made  $\text{NaCN}_3\text{H}_4$  (the mixture of  $\text{NaH}$  and Guanidine) heated at 330 K to form crystalline  $\text{NaCN}_3\text{H}_4$ . (right) Rietveld refinement of the 5-minute data set [APS, 17-BM].  $R_{\text{wp}} = 2.44\%$ . Monoclinic  $\text{NaCN}_3\text{H}_4$ , Space group 14,  $a = 7.9666(3) \text{ \AA}$ ,  $b = 5.0823(2) \text{ \AA}$ ,  $c = 9.4195(3) \text{ \AA}$ ,  $\beta = 110.683(3)^\circ$ . Orthorhombic  $\text{NaOH}$ , space group 63,  $a = 3.4(2) \text{ \AA}$ ,  $b = 3.4(2) \text{ \AA}$ ,  $c = 11.4005(3) \text{ \AA}$ .

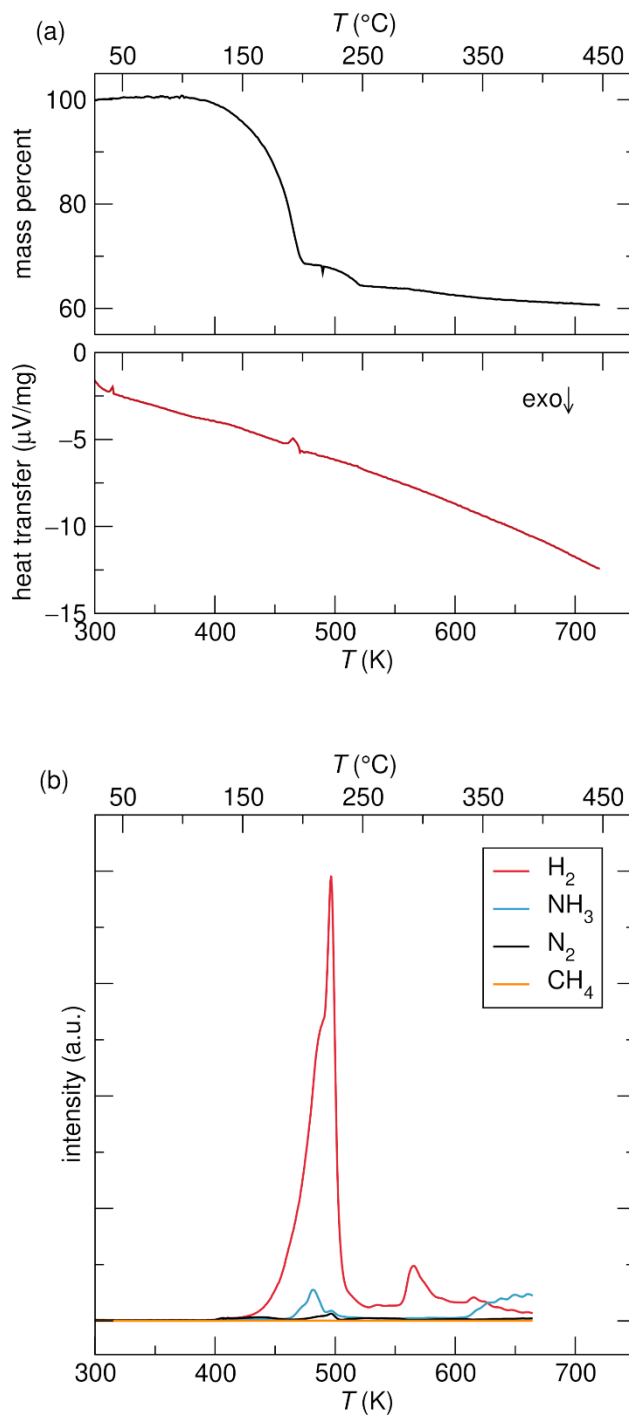

**Fig. S12.** (a) TGA weight loss, (b) DCS, and (c) mass spectroscopy of  $\text{NaCN}_3\text{H}_4$  with  $2\text{ }^\circ\text{C}/\text{min}$  heating rate to  $\approx 723\text{ K}$  ( $450\text{ }^\circ\text{C}$ ).  $\text{NaCN}_3\text{H}_4$  under He flow is stable and does not exhibit any exothermic heat event such as amorphization in the studied temperature range  $353\text{ K} - 388\text{ K}$  ( $80\text{ }^\circ\text{C} - 115\text{ }^\circ\text{C}$ ).

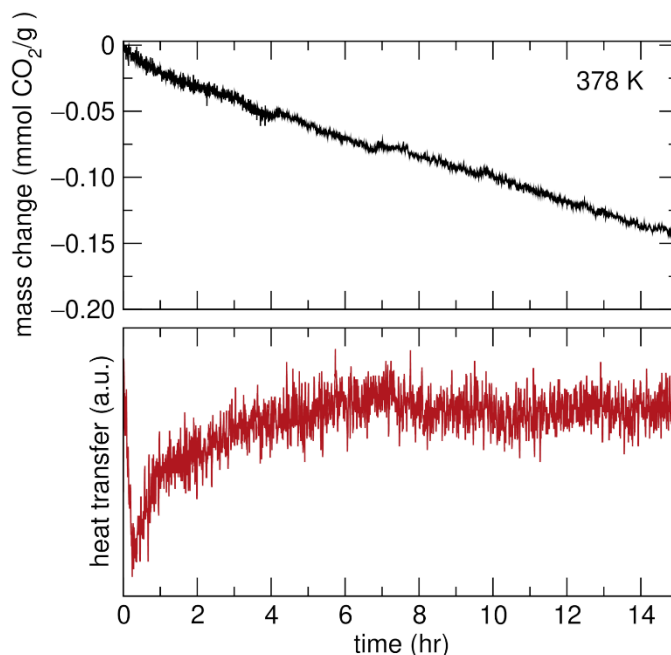

**Fig. S13.** TGA (top) and DSC (bottom) profiles of NaCN<sub>3</sub>H<sub>4</sub> under He flow held at 387 K (105°C) and monitored for 15 hours. Mass change has been converted from percent mass change to “mmol/g CO<sub>2</sub>” for easy comparison to plots shown in Fig. 3 and Fig. 5 in the main text, even though there is no CO<sub>2</sub> in the system. The graph shows that though there is minor loss of NaCN<sub>3</sub>H<sub>4</sub> under He gas, it is stable over the prolonged heating at the studied temperature range relative to the mass change observed in Fig. 3 and Fig. 5.

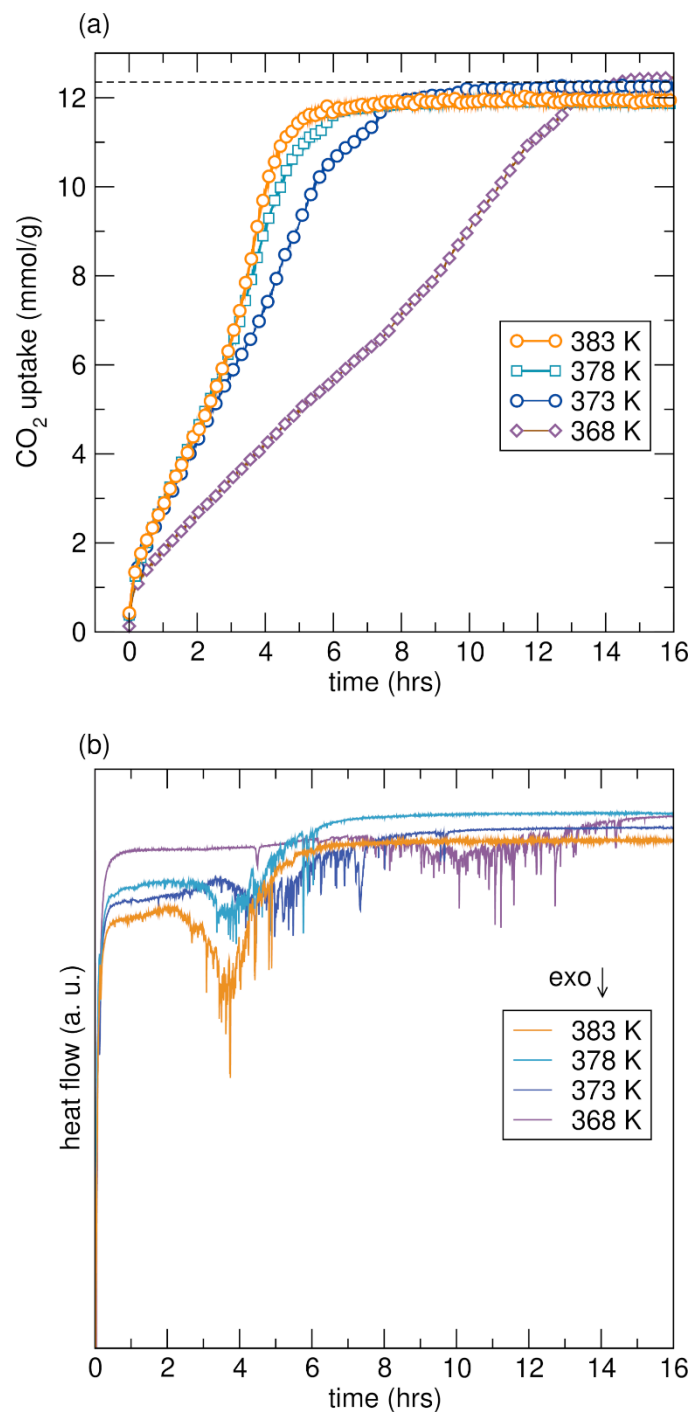

**Fig. S14.** TGA and DSC results of the wet CO<sub>2</sub> uptake profile at 95°C in comparison with wet CO<sub>2</sub> absorption profiles at  $\geq 100^\circ\text{C}$ . We also investigated the wet CO<sub>2</sub> absorption at temperature below 100°C as the sievert experiment indicates that CO<sub>2</sub> absorption can occur at as low as 80°C (Fig.1). The CO<sub>2</sub> uptake rate became significantly slower at 95°C compared to 100°C (Fig. S5). This suggests that temperature, which determines the interfacial diffusion of gases (i.e., H<sub>2</sub>O vapor) into bulk solid phase, should be the main external factor affecting the chemisorption rate in the humidity-excess condition.

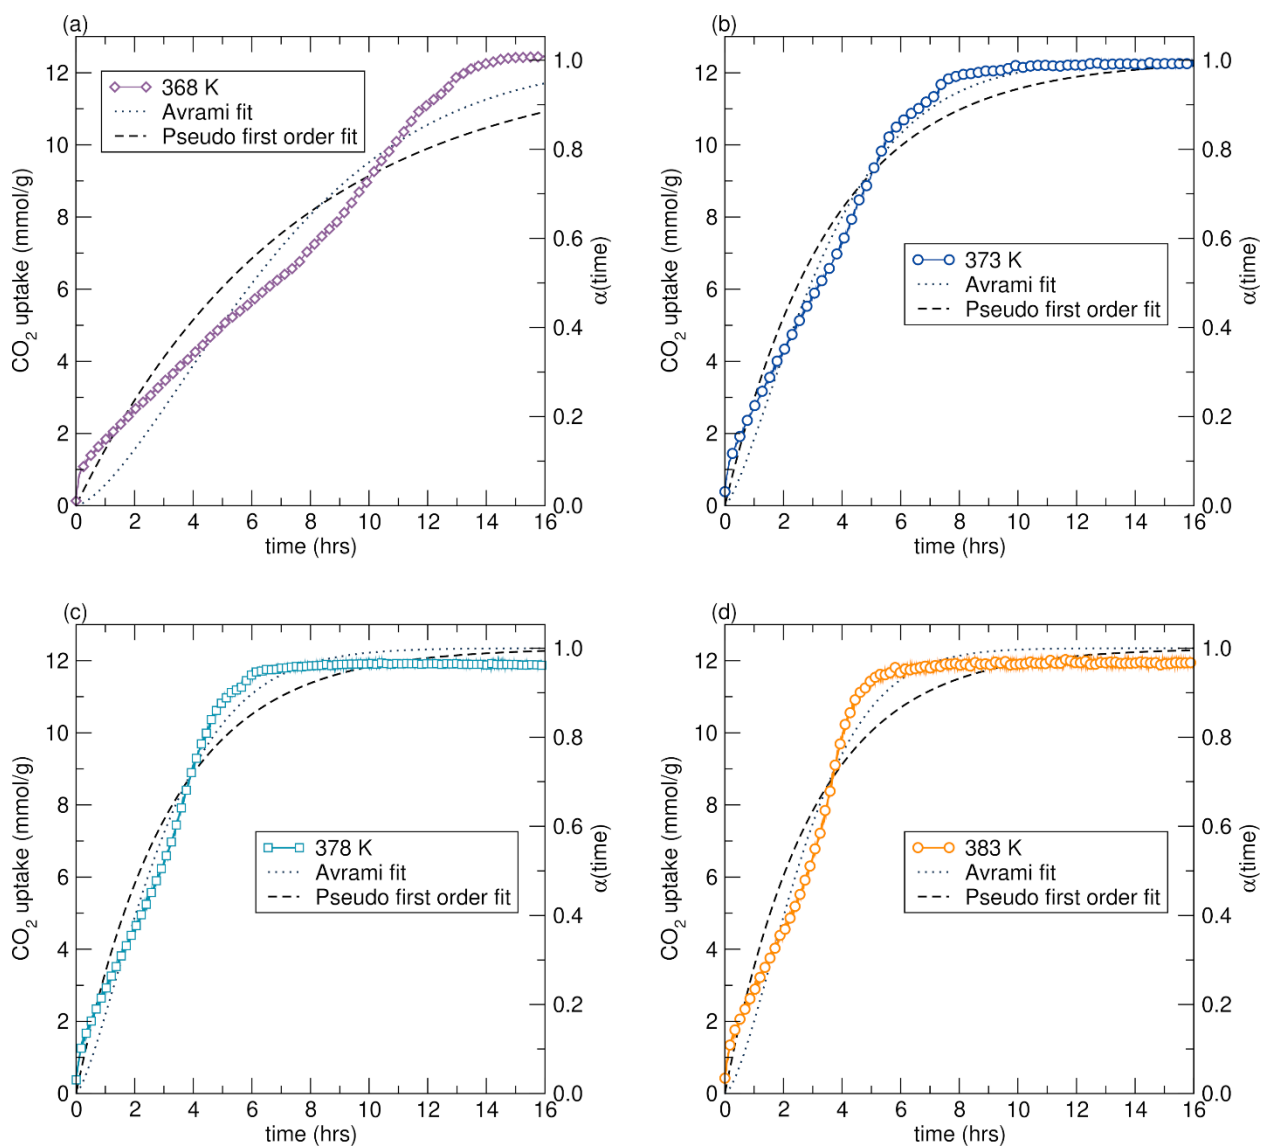

**Fig. S15.** Humidity-excess TGA CO<sub>2</sub> uptake profiles at different temperatures. The fits of the kinetic data using Pseudo 1<sup>st</sup> order and Avrami models at each temperature are indicated. The fitting parameters from these two models are summarized in Table S2.



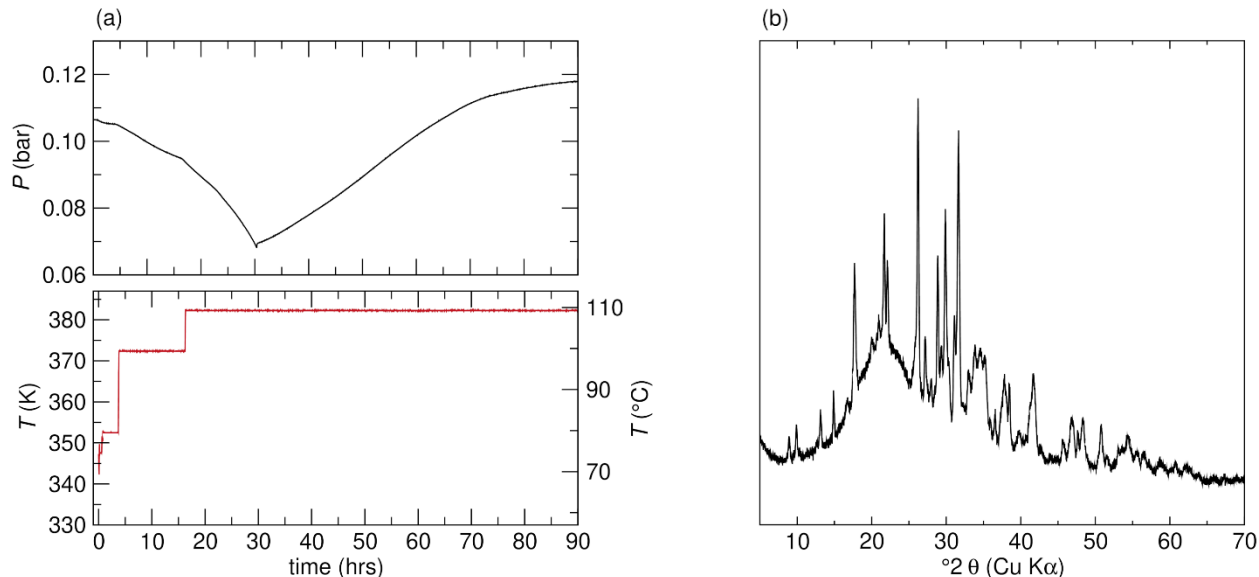

**Fig. S16.** a) CO<sub>2</sub> absorption change profile with an initial 0.1 bar CO<sub>2</sub> pressure and the tested temperature range of NaCN<sub>3</sub>H<sub>4</sub>. Note: Different from Fig. S1, temperature was kept at 383 K after induction. b) Laboratory PXRD results of the products collected after decomposition. The products are composed of many unknown phases besides Na<sub>2</sub>CO<sub>3</sub>.

Under the same static humidity-limited condition (as shown in Fig. 1) but with only 0.1 bar CO<sub>2</sub> pressure, we found that after the lengthy induction, the sample will start to decompose and did not undergo a rapid CO<sub>2</sub> absorption, implying the instability of the intermediates at high temperature with the scarce humidity. As discussed in the main text, the rapid absorption stage is dominated by thermodynamic driving force, therefore, the endothermic decomposition of the unstable intermediates can be effectively suppressed by reducing temperature, which meanwhile will not interfere the exothermic carbonation. As demonstrated in Fig. S1, the sample will continue to react with CO<sub>2</sub> after induction at a reduced temperature with the formation of desired (CN<sub>3</sub>H<sub>6</sub>)<sub>2</sub>CO<sub>3</sub> and Na<sub>2</sub>CO<sub>3</sub>.

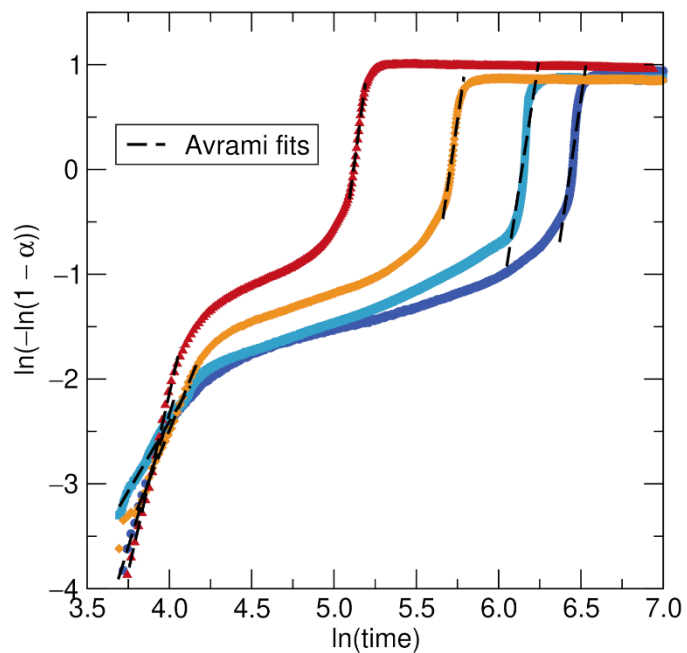

**Fig. S17** Avrami fitting to derive Avrami exponents ( $n$ ) at beginning and late reaction stages of the humidity limited TGA experiments. All values from Avrami fits can be found in Table S1

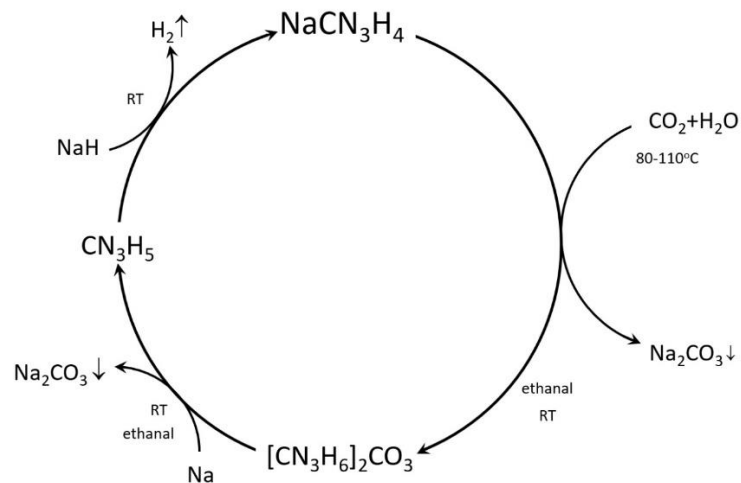

**Fig. S18** Proposed carbon capture and regeneration cycle of sodium guanidinate. The merits of such a system include that solid carbonate products i.e., guanidinium carbonate and sodium carbonate, can be easily separated in ethanol solution by filtration, and guanidinium carbonate fed back into the system.

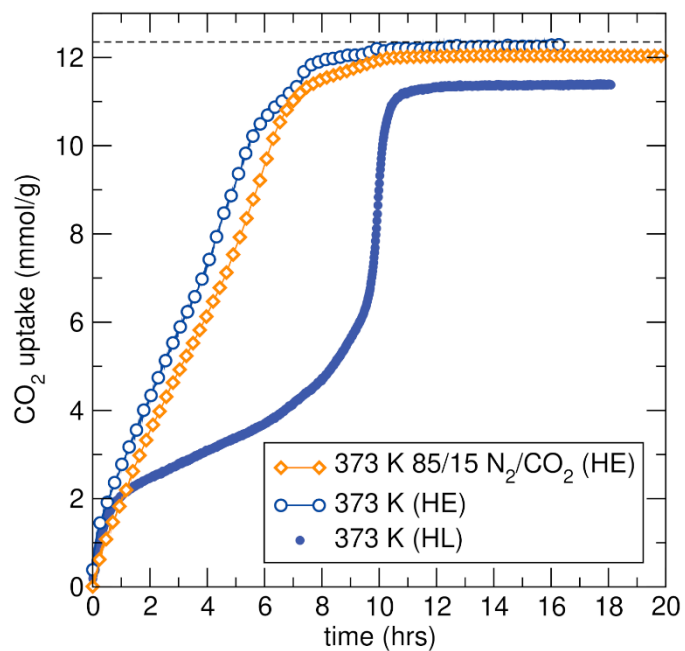

**Fig. S19** Flue gas (85/15 N<sub>2</sub>/CO<sub>2</sub>, humidity excess (HE)) TGA adsorption with NaCN<sub>3</sub>H<sub>4</sub> at 373 K. For comparison, humidity excess and humidity limited (HL) TGA runs with pure CO<sub>2</sub> are also graphed. The flow rate conditions are the same as was used for the pure CO<sub>2</sub> runs.

**Table S1.** Avrami kinetic rates ( $k_A$ ) and exponents ( $n$ ) at different reaction stages from the fitted lines in Fig. 3 using Avrami equation  $\ln \ln \frac{1}{1-\alpha(t)} = n \ln t + n \ln k_A$  for chemisorption under dry CO<sub>2</sub> stream. Reaction Time (min) is the approximate time taken to reach maximum adsorption, not the fitting range.  $\alpha(t)$  is the adsorption values normalized to the expected theoretical mmol/g CO<sub>2</sub> adsorption of the reaction, 12.345 mmol/g.

| Temp<br>C (K) | Reaction<br>Time<br>(min) | 0< $\alpha$ <0.1          |         | 0.1< $\alpha$ <0.4-0.5    |          | 0.4-0.5< $\alpha$ <1      |         |
|---------------|---------------------------|---------------------------|---------|---------------------------|----------|---------------------------|---------|
|               |                           | Avrami<br>exponent<br>(n) | $k_A$   | Avrami<br>exponent<br>(n) | $k_A$    | Avrami<br>exponent<br>(n) | $k_A$   |
| 100<br>(373)  | 690                       | 4.00                      | 0.01228 | 0.50                      | 0.000335 | 10.55                     | 0.00154 |
| 105<br>(378)  | 510                       | 3.01                      | 0.00798 | 0.66                      | 0.000760 | 10.06                     | 0.00217 |
| 110<br>(383)  | 320                       | 3.84                      | 0.00877 | 0.61                      | 0.000911 | 10.61                     | 0.00348 |
| 115<br>(388)  | 160                       | 6.79                      | 0.01319 | 0.87                      | 0.00387  | 11.04                     | 0.00645 |

**Table S2.** Fitting parameters from the Avrami kinetic model using equation  $\alpha(t)=1-\exp[-(k_A t)^n]$  and the pseudo 1<sup>st</sup> order model for chemisorption under wet CO<sub>2</sub> stream. Reaction Time (min) is the approximate time taken to reach maximum adsorption, not the fitting range.  $\alpha(t)$  is the adsorption values normalized to the expected theoretical mmol/g CO<sub>2</sub> adsorption of the reaction, 12.345 mmol/g.

| Temp °C<br>(K) | Reaction<br>Time (min) | Avrami model   |                        |                        | Seudo 1 <sup>st</sup> order model |                        |
|----------------|------------------------|----------------|------------------------|------------------------|-----------------------------------|------------------------|
|                |                        | k <sub>A</sub> | Avrami<br>exponent (n) | Fitting R <sup>2</sup> | k                                 | Fitting R <sup>2</sup> |
| 95 (368)       | 900                    | 0.00216        | 1.486                  | 0.955                  | 0.00128                           | 0.911                  |
| 100 (373)      | 575                    | 0.00431        | 1.342                  | 0.987                  | 0.00439                           | 0.966                  |
| 105 (378)      | 410                    | 0.00506        | 1.376                  | 0.979                  | 0.00530                           | 0.961                  |
| 110 (383)      | 370                    | 0.00530        | 1.510                  | 0.973                  | 0.00560                           | 0.947                  |



First, given the highly hygroscopic nature of NaCN<sub>3</sub>H<sub>4</sub>, we assume one unit of NaCN<sub>3</sub>H<sub>4</sub> can initially scavenge  $m$  amount of H<sub>2</sub>O from the surroundings before they were used for CO<sub>2</sub> absorption. Following reaction (1), this initial H<sub>2</sub>O ( $m$ ) inside the sample will contaminate the same amount of NaCN<sub>3</sub>H<sub>4</sub> ( $m$ ) to form equal amount of neutral guanidine ( $m$ ) and NaOH ( $m$ ) (reaction 1 in scheme 1) and leave remaining  $(1-m)$  amount of NaCN<sub>3</sub>H<sub>4</sub> unreacted, which are supported by the initial XRD patterns (Fig. 3 and 5). The  $m$  amount of NaOH produced could then react with CO<sub>2</sub>, following the path of reactions (2) and (3) (also labeled (2)+(3) in scheme S1) with sodium bicarbonate likely forming as an interim intermediate and sodium carbonate as the main reaction product observed in diffraction (Fig. 3 and 5). It should be noted that reactions (2)+(3) will produce  $(\frac{1}{2}m)$  Na<sub>2</sub>CO<sub>3</sub> and release  $(\frac{1}{2}m)$  H<sub>2</sub>O from  $m$  NaOH to keep the reaction balanced as shown in Scheme S1.

After the initial round of reactions (1), (2), and (3), the  $(\frac{1}{2} m)$  H<sub>2</sub>O released will continue to react with the same amount of NaCN<sub>3</sub>H<sub>4</sub>  $(\frac{1}{2} m)$  from the remaining  $(1-m)$  NaCN<sub>3</sub>H<sub>4</sub>, and start the second round of the reactions (1)+(2)+(3), resulting in  $(\frac{1}{2}m)$  CN<sub>3</sub>H<sub>5</sub> and  $(\frac{1}{2} m)$ NaOH. The latter will further react with CO<sub>2</sub> and generate  $(\frac{1}{4} m)$  Na<sub>2</sub>CO<sub>3</sub> as well as  $(\frac{1}{4} m)$  H<sub>2</sub>O to infest the rest NaCN<sub>3</sub>H<sub>4</sub>. If such “chain reactions” follow suit, the initial  $m$  amount of H<sub>2</sub>O present in the sample will reacts with totally  $m(1+\frac{1}{2}+\frac{1}{4}+\dots+(\frac{1}{2})^n)$  NaCN<sub>3</sub>H<sub>4</sub>. The sum of this geometry progression can be written as  $\sum_{n=0}^{\infty}(m(\frac{1}{2})^n)$ . If the reaction can go infinitely ( $n \rightarrow \infty$ ), the total amount of NaCN<sub>3</sub>H<sub>4</sub> that can react during the induction period would be  $2m$  and the unreacted NaCN<sub>3</sub>H<sub>4</sub> would be  $(1-2m)$ . To achieve the complete reactions just for the reactions (1)+(2)+(3),  $m$  should at least be  $\frac{1}{2}$ , i.e., initial one unit of NaCN<sub>3</sub>H<sub>4</sub> needs to absorb half of its total amount of H<sub>2</sub>O, which is a substantial amount to be initially scavenged by samples handled in a glovebox.



In addition, the freshly formed  $\text{CN}_3\text{H}_5$  from reaction (1) is highly hygroscopic. Thus it can be speculated that some of the leftover  $\text{H}_2\text{O}$  ( $y$ ) emitted by reaction (2)(3) (dash black arrowed lines in scheme 1) can also diffuse and react with  $\text{CN}_3\text{H}_5$  to generate guanidinium hydroxide ( $(\text{CN}_3\text{H}_6)(\text{OH})$ ) and/or other intermediates. Therefore, in the static humidity-limited condition,  $\text{CO}_2$  absorption will be significantly limited by both  $\text{H}_2\text{O}$  related diffusion pathways. For the humidity-limited flow  $\text{CO}_2$  condition, from the improved absorption kinetics (main text Fig. 2 and 3), it is reasonable to deduce that the feeding  $\text{CO}_2$  must also provide certain amount of  $\text{H}_2\text{O}$  ( $x$ ) to participate in these reactions. Apparently, the *extent* and the *rate* of these reactions can largely be controlled by the humidity level from the feeding  $\text{CO}_2$  and the diffusion of  $\text{H}_2\text{O}$  within the samples, which was demonstrated by the extreme case of the  $\text{CO}_2$  absorption under the humidity-excess condition (main text Fig. 4 and 5).
